# Supplementary material
Source: MDPI journal article supplement (https://www.mdpi.com/2254-9625/13/11/188)
Supplement: s1 [file s1]

Three factor model without covariances considered (Model 1)

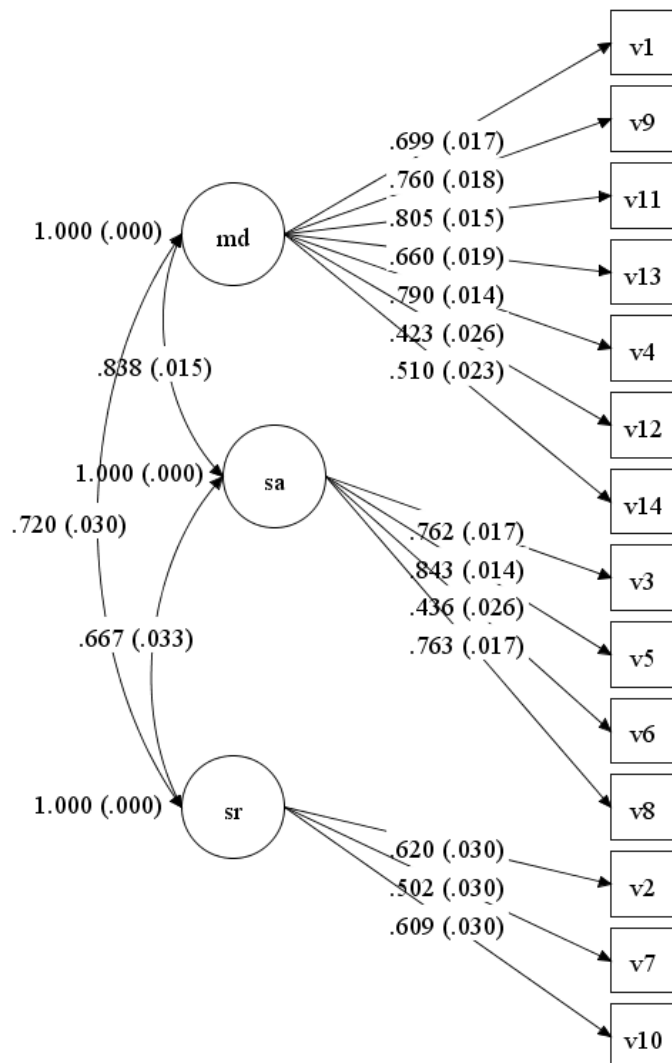

|                                                     |           |       |
|-----------------------------------------------------|-----------|-------|
| Chi-Square Test of Model Fit                        |           |       |
| Value                                               | 624.395*  |       |
| Degrees of Freedom                                  | 74        |       |
| P-Value                                             | 0.0000    |       |
| RMSEA (Root Mean Square Error Of Approximation)     |           |       |
| Estimate                                            | 0.067     |       |
| 90 Percent C.I.                                     | 0.062     | 0.072 |
| Probability RMSEA <= .05                            | 0.000     |       |
| CFI/TLI                                             |           |       |
| CFI                                                 | 0.954     |       |
| TLI                                                 | 0.944     |       |
| Chi-Square Test of Model Fit for the Baseline Model |           |       |
| Value                                               | 12076.025 |       |
| Degrees of Freedom                                  | 91        |       |
| P-Value                                             | 0.0000    |       |
| SRMR (Standardized Root Mean Square Residual)       |           |       |
| Value                                               | 0.044     |       |

One factor model (Model 3)

MODEL FIT INFORMATION

Chi-Square Test of Model Fit

Value 896.142\*

Degrees of Freedom 77

P-Value 0.0000

RMSEA (Root Mean Square Error Of Approximation)

Estimate 0.080

90 Percent C.I. 0.075 0.085

Probability RMSEA <= .05 0.000

CFI/TLI

CFI 0.932

TLI 0.919

Chi-Square Test of Model Fit for the Baseline Model

Value 12076.025

Degrees of Freedom 91

P-Value 0.0000

SRMR (Standardized Root Mean Square Residual)

Value 0.054
