# Supplementary material
Source: MDPI journal article supplement (https://www.mdpi.com/2254-9625/13/11/188)
Supplement: s1 [file s1]

# RAADS-14 Rus

ФИО:

Дата:

Пожалуйста, оцените, насколько верно каждое из утверждений наиболее точно описывает вас в настоящее время и в детстве (до 16 лет), и поставьте отметку в соответствующей графе. Пожалуйста, ограничьте свой выбор одним ответом для каждого пункта.

| Переживания и индивидуальные особенности, которые могут вас характеризовать |                                                                                                                                              | Верно и сейчас, и в детстве | Верно только сейчас      | Было верно только для возраста до 16 лет | Неверно и никогда не было верно |
|-----------------------------------------------------------------------------|----------------------------------------------------------------------------------------------------------------------------------------------|-----------------------------|--------------------------|------------------------------------------|---------------------------------|
| 1.                                                                          | Во время разговора с другими людьми мне сложно понять, что они чувствуют                                                                     | <input type="checkbox"/>    | <input type="checkbox"/> | <input type="checkbox"/>                 | <input type="checkbox"/>        |
| 2.                                                                          | Мне очень неприятно ощущать прикосновение некоторых обычных материалов к своей коже, хотя других они, похоже, не раздражают                  | <input type="checkbox"/>    | <input type="checkbox"/> | <input type="checkbox"/>                 | <input type="checkbox"/>        |
| 3.                                                                          | Мне очень сложно действовать и работать в коллективах                                                                                        | <input type="checkbox"/>    | <input type="checkbox"/> | <input type="checkbox"/>                 | <input type="checkbox"/>        |
| 4.                                                                          | Мне сложно понять, что от меня ожидают другие люди                                                                                           | <input type="checkbox"/>    | <input type="checkbox"/> | <input type="checkbox"/>                 | <input type="checkbox"/>        |
| 5.                                                                          | Я часто не знаю, как вести себя при взаимодействии с другими людьми                                                                          | <input type="checkbox"/>    | <input type="checkbox"/> | <input type="checkbox"/>                 | <input type="checkbox"/>        |
| 6.                                                                          | Я могу поболтать о пустяках с другими людьми                                                                                                 | <input type="checkbox"/>    | <input type="checkbox"/> | <input type="checkbox"/>                 | <input type="checkbox"/>        |
| 7.                                                                          | Когда я чувствую, что перегружен ощущениями, мне нужно уединиться, чтобы приглушить их.                                                      | <input type="checkbox"/>    | <input type="checkbox"/> | <input type="checkbox"/>                 | <input type="checkbox"/>        |
| 8.                                                                          | Как находить друзей и общаться – загадка для меня                                                                                            | <input type="checkbox"/>    | <input type="checkbox"/> | <input type="checkbox"/>                 | <input type="checkbox"/>        |
| 9.                                                                          | Когда я разговариваю с кем-то, мне трудно понять, когда моя очередь говорить или слушать                                                     | <input type="checkbox"/>    | <input type="checkbox"/> | <input type="checkbox"/>                 | <input type="checkbox"/>        |
| 10.                                                                         | Иногда мне приходится затыкать уши, чтобы приглушить нестерпимый шум (например, звук пылесоса или слишком громкий или многословный разговор) | <input type="checkbox"/>    | <input type="checkbox"/> | <input type="checkbox"/>                 | <input type="checkbox"/>        |
| 11.                                                                         | Мне бывает очень сложно понять выражение лица, позу и значение жестов собеседника.                                                           | <input type="checkbox"/>    | <input type="checkbox"/> | <input type="checkbox"/>                 | <input type="checkbox"/>        |
| 12.                                                                         | Я концентрируюсь на деталях, а не на общей идее                                                                                              | <input type="checkbox"/>    | <input type="checkbox"/> | <input type="checkbox"/>                 | <input type="checkbox"/>        |
| 13.                                                                         | Я воспринимаю сказанное слишком буквально, поэтому часто упускаю, что пытается сказать собеседник                                            | <input type="checkbox"/>    | <input type="checkbox"/> | <input type="checkbox"/>                 | <input type="checkbox"/>        |
| 14.                                                                         | Меня очень расстраивает, когда мне приходится изменять привычный образ действий                                                              | <input type="checkbox"/>    | <input type="checkbox"/> | <input type="checkbox"/>                 | <input type="checkbox"/>        |

## Подсчет баллов

Большинство вопросов имеют прямое кодирование.

Верно и сейчас, и в детстве = 3, Верно только сейчас = 2, Было верно только для возраста до 16 лет = 1, Неверно и никогда не было верно = 0

В вопросах, отмеченных буквой R, следует использовать обратное кодирование (Верно и сейчас, и в детстве = 0, Верно только сейчас = 1, Было верно только для возраста до 16 лет = 2, Неверно и никогда не было верно = 3).

Для оценки каждой из шкал сложите результаты соответствующих вопросов:  
Социальная ментализация (СМ) (7 пунктов, минимальное значение 0, максимальное значение 21): 1, 4, 9, 11, 12, 13, 14

Сложности социального взаимодействия (ССВ) (4 пункта, минимальное значение 0, максимальное значение 12): 3, 5, 6R, 8

Сенсорное восприятие и когнитивный стиль (СВиКС) (3 пункта, минимальное значение 0, максимальное значение 9): 2, 7, 10,

Итоговая оценка получается сложением результатов по всем трём шкалам и может использоваться при скрининге расстройств аутистического спектра (минимально возможное значение 0 баллов, максимально возможное значение 42 балла).

## Интерпретация результатов:

От 0 до 16 баллов — низкая выраженность аутистических характеристик и очень низкий риск наличия РАС;

От 17 до 21 балла — умеренная выраженность аутистических характеристик, низкий риск наличия РАС;

От 22 до 29 баллов — высокая выраженность аутистических характеристик, значительный риск наличия РАС;

От 30 до 42 баллов — очень высокая выраженность аутистических характеристик, высокий риск наличия РАС.

## RAADS-14 Screen

|              |                    |
|--------------|--------------------|
| <b>Name:</b> | <b>Patient ID:</b> |
| <b>Date:</b> | <b>Clinician:</b>  |

Please choose one of the following alternatives:

This is true or describes me now and when I was young.

This was true or describes me only now (refers to skills acquired).

This was true only when I was young (16 years or younger).

This was never true and never described me.

Please answer the questions according to what is true for *you*. Check only one column per statement!

| Some life experiences and personality characteristics that may apply to you                                                       | True now<br>and when I<br>was young | True only<br>now         | True only<br>when I was<br>younger<br>than 16 | Never true               |
|-----------------------------------------------------------------------------------------------------------------------------------|-------------------------------------|--------------------------|-----------------------------------------------|--------------------------|
| 1. It is difficult for me to understand how other people are feeling when we are talking                                          | <input type="checkbox"/>            | <input type="checkbox"/> | <input type="checkbox"/>                      | <input type="checkbox"/> |
| 2. Some ordinary textures that do not bother others feel very offensive when they touch my skin                                   | <input type="checkbox"/>            | <input type="checkbox"/> | <input type="checkbox"/>                      | <input type="checkbox"/> |
| 3. It is very difficult for me to work and function in groups                                                                     | <input type="checkbox"/>            | <input type="checkbox"/> | <input type="checkbox"/>                      | <input type="checkbox"/> |
| 4. It is difficult to figure out what other people expect of me                                                                   | <input type="checkbox"/>            | <input type="checkbox"/> | <input type="checkbox"/>                      | <input type="checkbox"/> |
| 5. I often don't know how to act in social situations                                                                             | <input type="checkbox"/>            | <input type="checkbox"/> | <input type="checkbox"/>                      | <input type="checkbox"/> |
| 6.* I can chat and make small talk with people                                                                                    | <input type="checkbox"/>            | <input type="checkbox"/> | <input type="checkbox"/>                      | <input type="checkbox"/> |
| 7. When I feel overwhelmed by my senses, I have to isolate myself to shut them down                                               | <input type="checkbox"/>            | <input type="checkbox"/> | <input type="checkbox"/>                      | <input type="checkbox"/> |
| 8. How to make friends and socialize is a mystery to me                                                                           | <input type="checkbox"/>            | <input type="checkbox"/> | <input type="checkbox"/>                      | <input type="checkbox"/> |
| 9. When talking to someone, I have a hard time telling when it is my turn to talk or to listen                                    | <input type="checkbox"/>            | <input type="checkbox"/> | <input type="checkbox"/>                      | <input type="checkbox"/> |
| 10. Sometimes I have to cover my ears to block out painful noises (like vacuum cleaners or people talking too much or too loudly) | <input type="checkbox"/>            | <input type="checkbox"/> | <input type="checkbox"/>                      | <input type="checkbox"/> |
| 11. It can be very hard to read someone's face, hand, and body movements when we are talking                                      | <input type="checkbox"/>            | <input type="checkbox"/> | <input type="checkbox"/>                      | <input type="checkbox"/> |
| 12. I focus on details rather than the overall idea                                                                               | <input type="checkbox"/>            | <input type="checkbox"/> | <input type="checkbox"/>                      | <input type="checkbox"/> |
| 13. I take things too literally, so I often miss what people are trying to say                                                    | <input type="checkbox"/>            | <input type="checkbox"/> | <input type="checkbox"/>                      | <input type="checkbox"/> |
| 14. I get extremely upset when the way I like to do things is suddenly changed                                                    | <input type="checkbox"/>            | <input type="checkbox"/> | <input type="checkbox"/>                      | <input type="checkbox"/> |

## RAADS-14 Screen

### Scoring:

- All items (except item 6 which is reversed and therefore marked with\*) range from 3 to 0.
- The score ranges from a minimum of 0 to a maximum of 42.

### RAADS-14 Screen contains three subdomains:

- Mentalizing deficits: items 1, 4, 9, 11, 12, 13, 14 (explaining 32.5% of the variance)
- Social anxiety: items 3,5,6,8 (explaining 8.5% of the variance)
- Sensory reactivity: items 2,7,10 (explaining 6.4% of the variance)

### Median score for different populations:

- **32** in 135 adults with normal intelligence diagnosed with autism spectrum disorder (ASD).
- **15** in 344 adults with normal intelligence diagnosed with attention deficit hyperactivity disorder (ADHD).
- **11** in the collapsed group of 164 adults with other psychiatric disorders, specified as psychotic disorder (n=30), mood disorder (n=59), anxiety disorder or OCD (n=67) and borderline personality disorder (n=39). The sums of reported diagnoses exceed the number of patients in the group because of co-occurring diagnoses.
- **3** in 590 non-psychiatric controls

### A cut-off score of 14 or above reached a sensitivity of 97% and a specificity of:

- 46% for the ADHD group.
- 64% for the other psychiatric disorders group (described above).
- 95% for the non-psychiatric controls.

### The discriminatory power of the first five items in the RAADS-14 Screen:

- A cut-off point of 4 or greater from a maximum of 15 points yielded a sensitivity of 93% and a specificity of 45% in the ADHD sample, 49% in the other psychiatric disorders group, and 90% in the non-psychiatric sample.

RAADS-14-Screen is an abridged version of Ritvo Autism and Asperger Diagnostic Scale-Revised (RAADS-R). Cite: Eriksson JM, Andersen MJ, Bejerot S. RAADS-14 Screen: validity of a screening tool for Autism Spectrum Disorder in an adult psychiatric population. Molecular Autism 2013; 4:49.
